# Supplementary material
Source: PubMed Central journal article supplement (PMC3259907)
Supplement: M805822200_1.pdf [file M805822200_1.pdf]

AA depletion (2 h) → AA readdition (30 min)

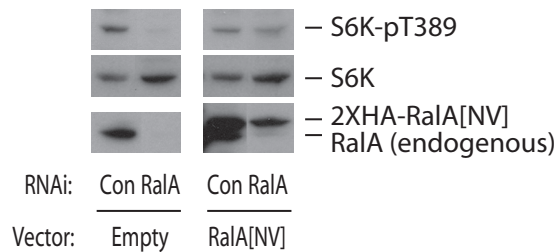

**Supplemental Figure 2. RNAi-resistant form of RalA overcomes the inhibitory effect of RalA knockdown on amino acid-induced S6K phosphorylation.**

RNAi-resistant RalA mutant (for RALA RNAi #3) was generated by introducing silent mutations at codon 150 (asparagine, aat/aac) and 151 (valine, gtt/gtg). RalA cDNA bearing the silent mutations with tandem HA-tag at the N-terminus was cloned into BamHI/XhoI site of pcDNA3 (Invitrogen) to generate 2XHA-RalA[N150V151]/pcDNA3.

HeLa cells were transfected with control siRNA or RalA siRNA #3. After 1-day culture, cells were further transfected with either 2XHA-RalA[N150V151]/pcDNA3 or empty vector, and cultured for 1 day. Cells were then starved for amino acids for 2 h, then treated with amino acids for 30 min, followed by immunoblot analysis. Unprocessed original gel images are represented in Supplemental Figure 5.

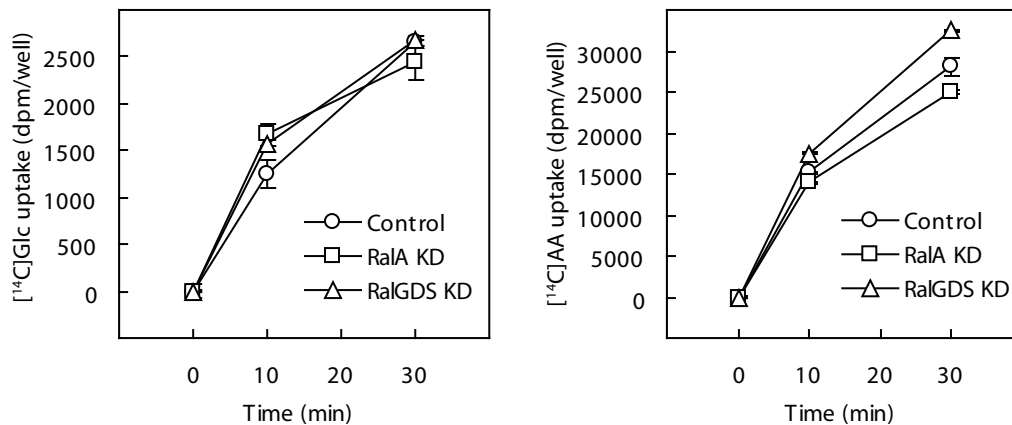

**Supplemental Figure 3. Knockdown of RalA and RalGDS does not inhibit nutrient uptake.**

HeLa cells grown on 24-well plate were transfected with control siRNA (open circles), siRNA against RalA (open squares), or siRNA against RalGDS (open triangles). After 2-day culture, cells were starved for glucose (Left panel) or amino acids (Right panel) for 2 h. For glucose uptake assay (Left panel), cells were treated with 1 mM [<sup>14</sup>C]glucose (2 μCi/ml, GE Healthcare). For amino acid uptake assay (Right panel), cells were treated with amino acids (by addition of standard RPMI1640 medium) with [<sup>14</sup>C]amino acid mix (2 μCi/ml, ARC). After the incubation for indicated times, cells were washed with ice-cold PBS and lysed in 0.25 ml of 0.03% SDS solution. Radioactivity in the lysate was determined by liquid scintillation counter and represented as average ± difference from duplicated determinations in a typical study.

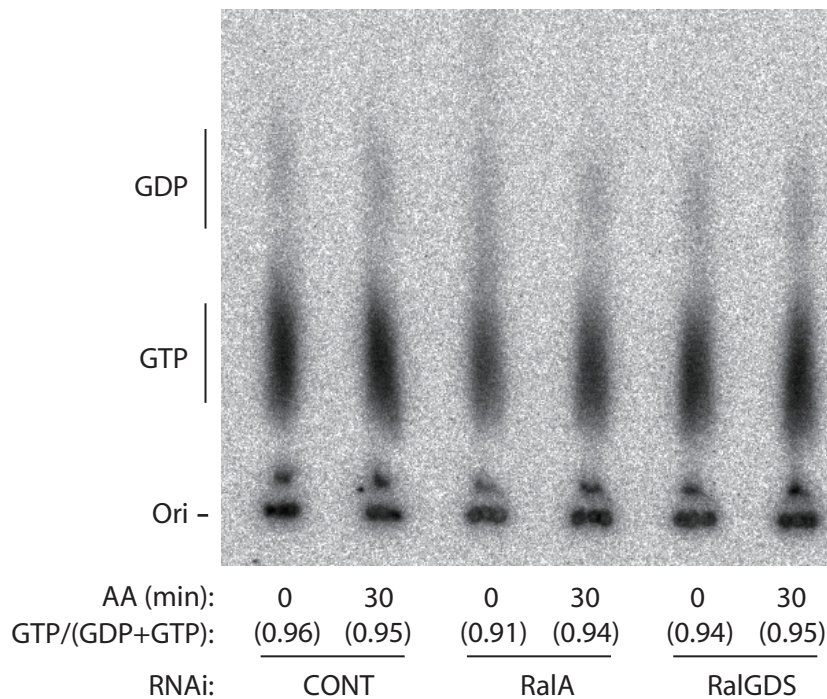

#### Supplemental Figure 4. Knockdown of RalA and RalGDS does not affect activation status of Rheb.

HeLa cells were transfected with control siRNA, siRNA against RalA, or siRNA against RalGDS. After 1-day culture, cells were further transfected with myc-Rheb/pCAGGS plasmid DNA and further cultured for 1 day. Cells were then starved for amino acids and radiolabeled in amino acid-free RPMI1640 medium supplemented by [<sup>32</sup>P]orthophosphate (Perkin Elmer, 0.15 mCi/ml) for 2 h. After the incubation in standard RPMI1640 medium (for amino acids stimulation) for indicated times, cells were washed with PBS and lysed in ice-cold Lysis buffer (50 mM Tris-HCl [pH 7.5], 120 mM NaCl, 1% NP-40, 10 mM MgCl<sub>2</sub>, 1 mM Na-EDTA, 1 mM Na-EGTA, 25 mM NaF, 25 mM β-glycerophosphate, 15 mM Na-pyrophosphate, 0.05 μM microcystin LR, 1 mM Na-orthovanadate, 0.02% β-mercaptoethanol, 2 μg/ml aprotinin, 2 μg/ml leupeptin, 2 μg/ml pepstatin A, 1 mM PMSF, 1 mM benzamide-HCl). All procedures after this step were performed at 4°C. Lysates were mixed with Protein G Sepharose beads (GE Healthcare) conjugated with anti-myc 9B11 antibody (Cell Signaling Technology) and incubated for 2 h. Beads were collected by centrifugation and washed with Lysis buffer extensively. Then bound nucleotides were extracted from the beads in Nucleotide elution buffer (10 mM Na-EDTA, 2 mM DTT, 0.2% SDS, 0.5 mM GTP, 0.5 mM GDP) by the incubation at 68°C for 20 min. Eluted nucleotides were separated on PEI-cellulose TLC plate with 0.75 M KH<sub>2</sub>PO<sub>4</sub> (pH 3.4). Radioactive spots were analyzed by BAS2000 imaging analyzer and calculated ratios were represented. Similar results were obtained from repeated experiments.

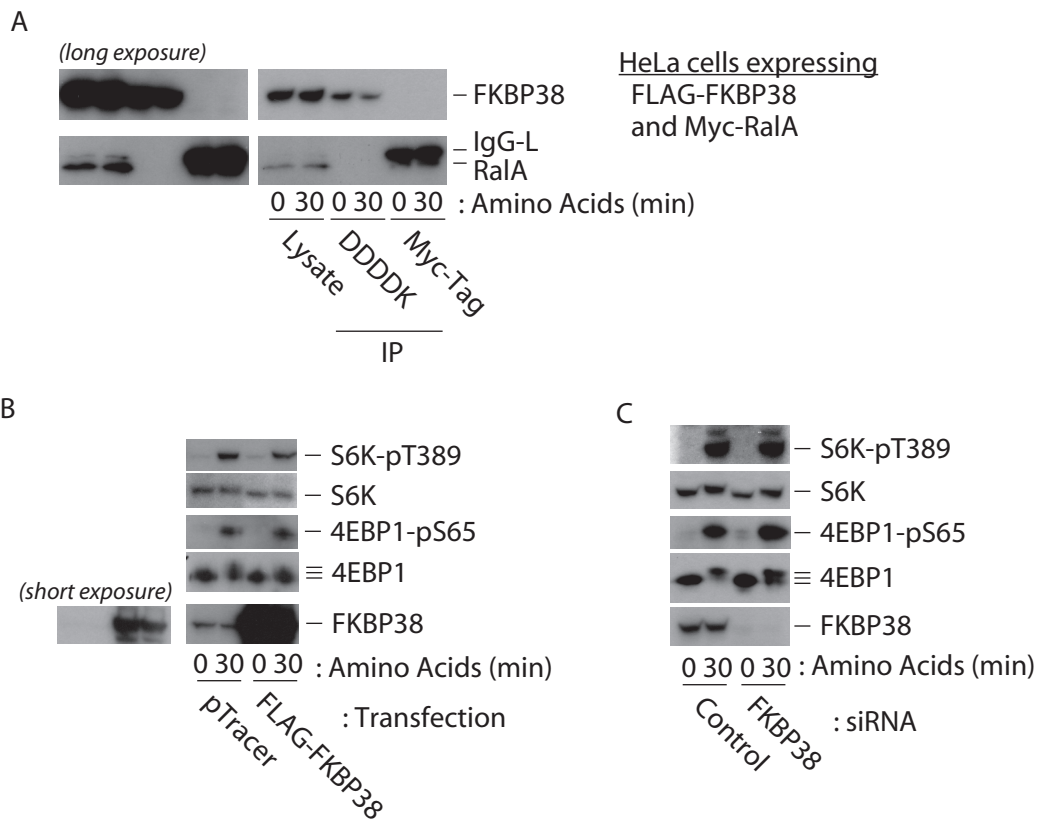

### Supplemental Figure 5. RalA does not interact with FKBP38.

(A) HeLa cells were transfected with FLAG-FKBP38/pTracer and Myc-RalA/pCMV5. After 1 day in culture, cells were deprived of amino acids for 1 h. Cells were then exposed to amino acids for the indicated times, and lysed in a buffer consisting of 50 mM Na-Hepes (pH 7.4), 1% NP-40, 25 mM NaF, 15 mM Na-pyrophosphate, 25 mM  $\beta$ -glycerophosphate, 120 mM NaCl, 1 mM EDTA, 1 mM EGTA, 1 mM Na-orthovanadate, 0.02%  $\beta$ -mercaptoethanol, 0.1  $\mu$ M microcystin LR, and protease inhibitor cocktail. After removal of insoluble materials, FLAG-FKBP38 and Myc-RalA were immunoprecipitated using anti-DDDDK (MBL) and anti-Myc 9B11 (Cell Signalling) antibodies, respectively, with Protein G Sepharose beads (GE Healthcare). Immunoprecipitants were washed with the same buffer, followed by immunoblot analysis with anti-FKBP38 (R&D systems) and anti-RalA (R&D systems). FLAG-FKBP38/pTracer plasmid DNA was generated by cloning of full-length human FKBP38 cDNA into pTracer-CMV vector (Invitrogen) with the addition of FLAG-tag sequence at the 5'-end. (B) HeLa cells were transfected with empty pTracer or FLAG-FKBP38/pTracer. After 1 day in culture, cells were deprived of amino acids for 1 h. Cells were then exposed to amino acids for the indicated times followed by immunoblot analysis. (C) HeLa cells were transfected with control siRNA or siRNA against FKBP38 (Ambion AM51331). After 1 day in culture, cells were deprived of amino acids for 1 h. Cells were then exposed to amino acids for the indicated times followed by immunoblot analysis.

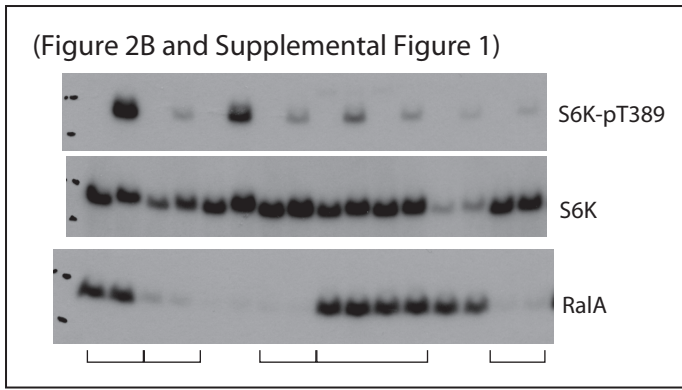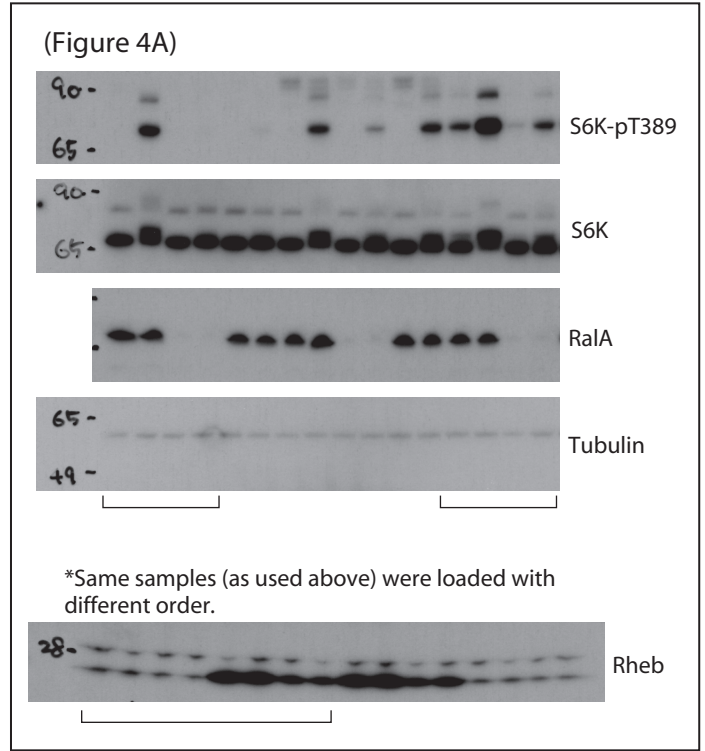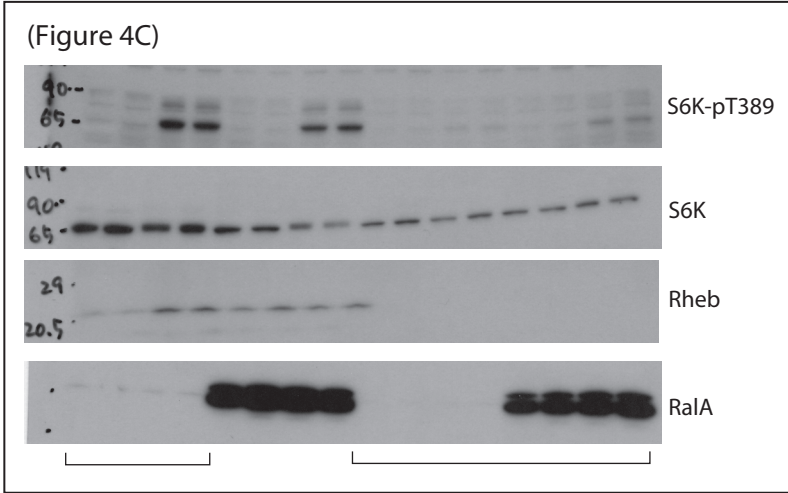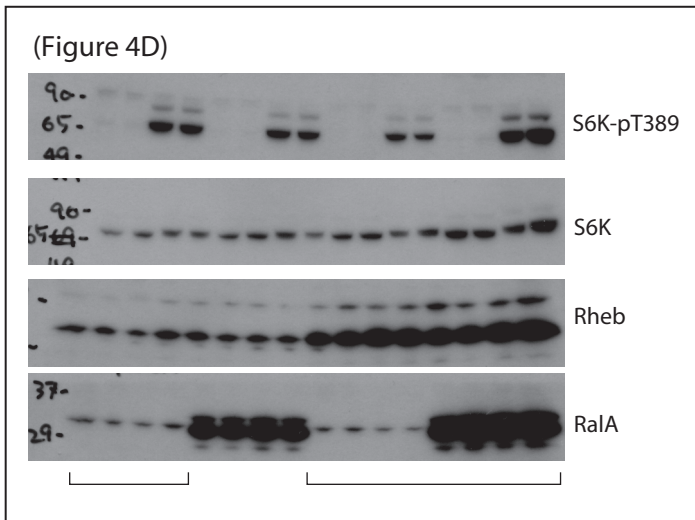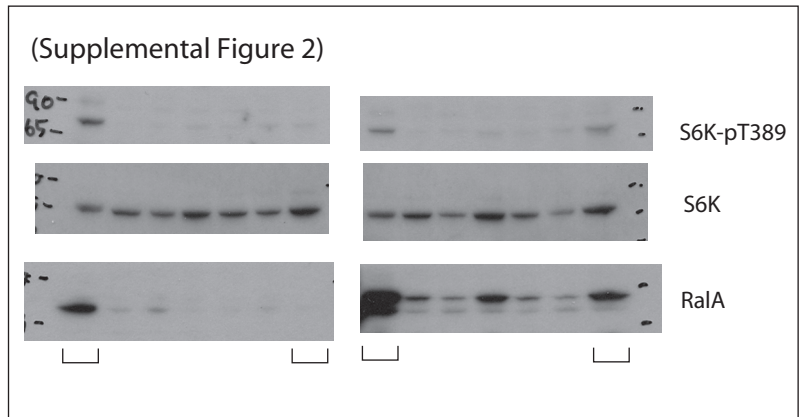

**Supplemental Figure 6. Unprocessed original images for Figures 2 and 4, and Supplemental Figures 1 and 2.**  
Images used (extracted) in each figure were indicated with brackets.
